# Supplementary material for: Near-infrared photoactivatable control of Ca2+ signaling and optogenetic immunomodulation
Source: eLife journal article supplement (doi:10.7554/elife.10024), 2015-12-08

# Figure 1 – figure supplement 5

a

ORAI1: LOVSoc

(IRES/ T2A co-expression system)

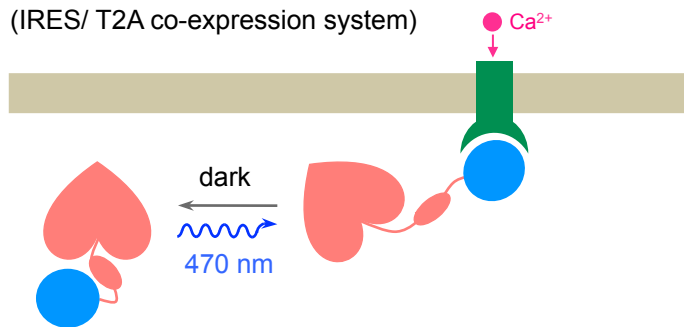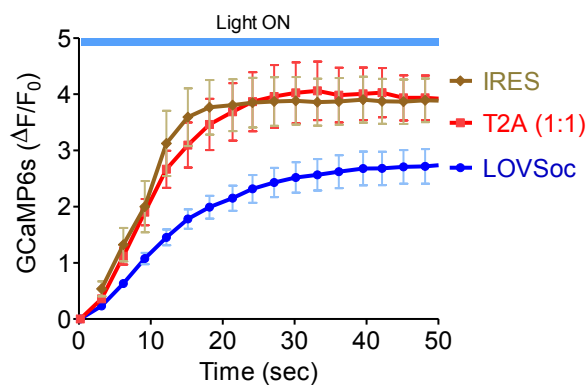

b

Lyn11-LOVSoc

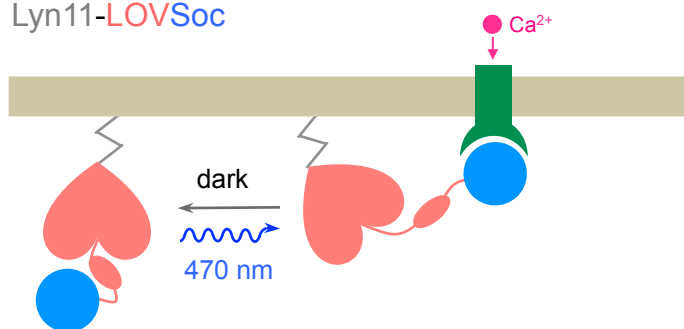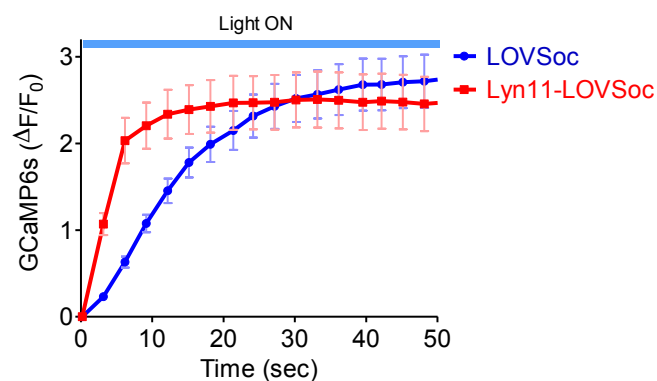

c

(LOVSoc)<sub>2</sub> or ORAI1-(LOVSoc)<sub>2</sub>

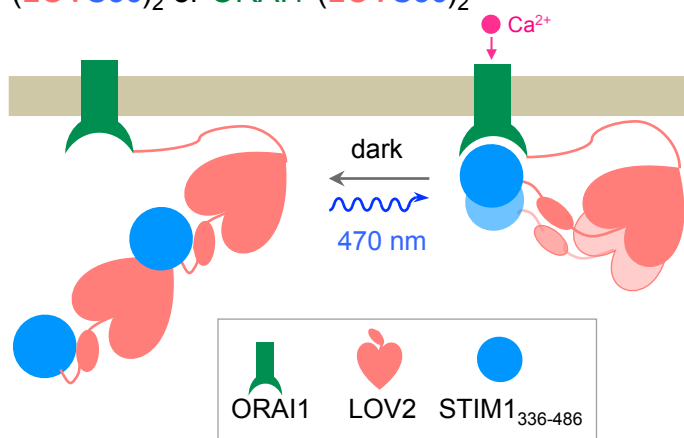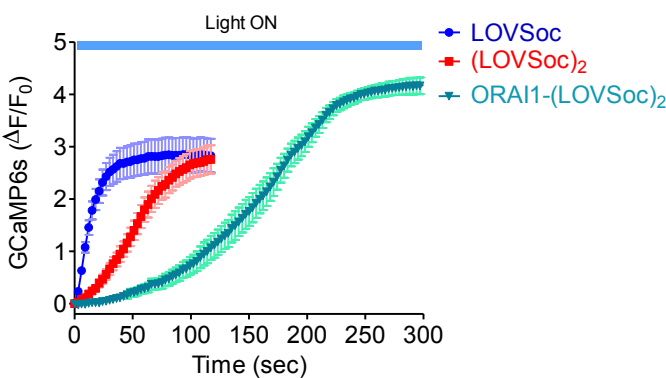

d

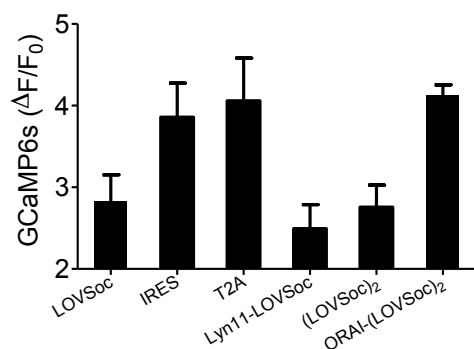

e

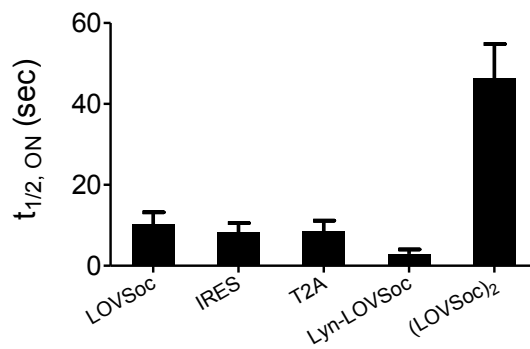

Supplement: supp [file elife_poa_e10024_Figure_1_figure_supplement_5.pdf › elife_poa_e10024_Figure_1_figure_supplement_5.pdf]
