# Supplementary figures and images for: Near-infrared photoactivatable control of Ca2+ signaling and optogenetic immunomodulation
Source: eLife journal article supplement (doi:10.7554/elife.10024), 2015-12-08

Figure 1 – figure supplement 1

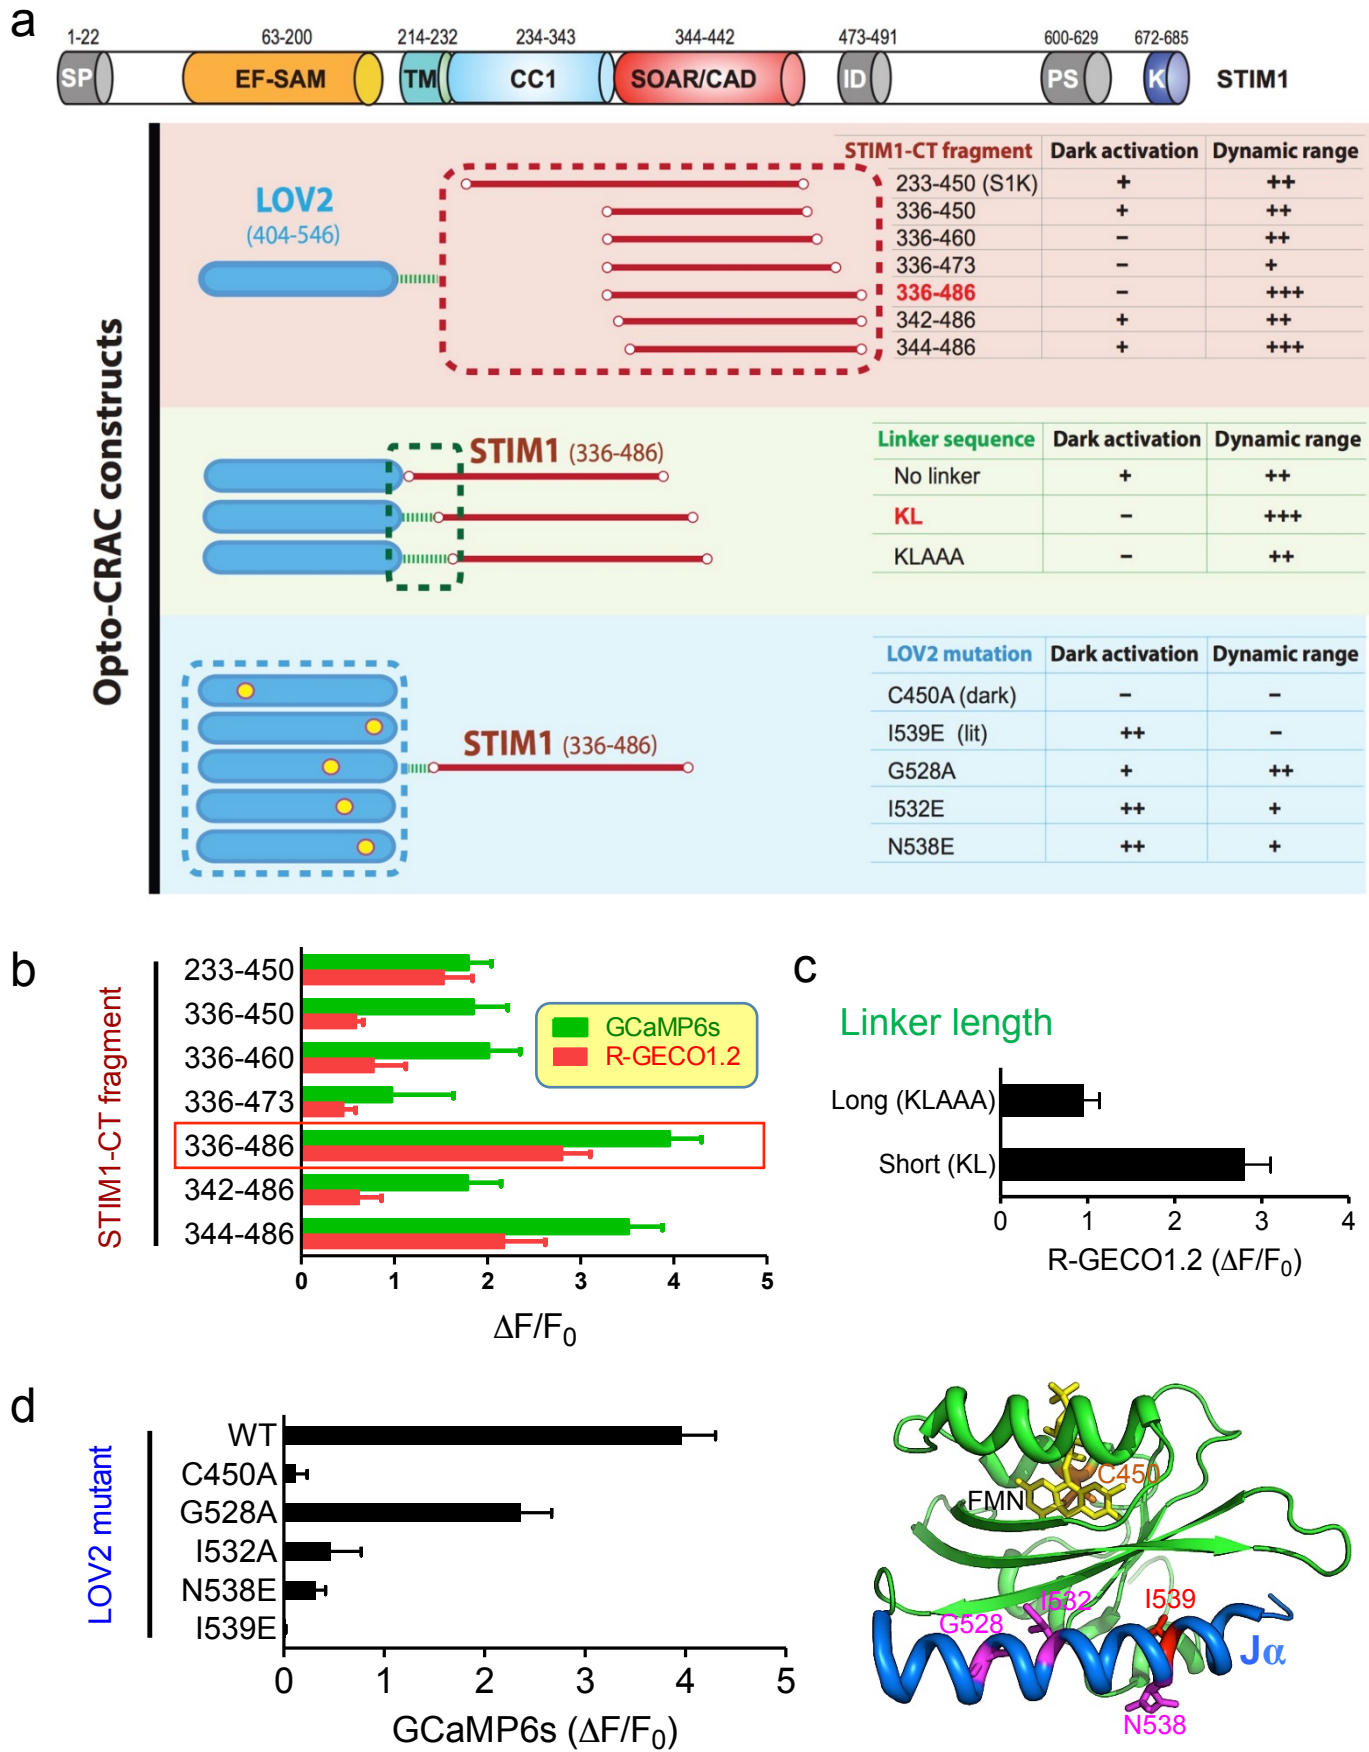

Supplement: supp [file elife_poa_e10024_Figure_1_figure_supplement_1.pdf › elife_poa_e10024_Figure_1_figure_supplement_1.pdf]

Figure 1 – figure supplement 2

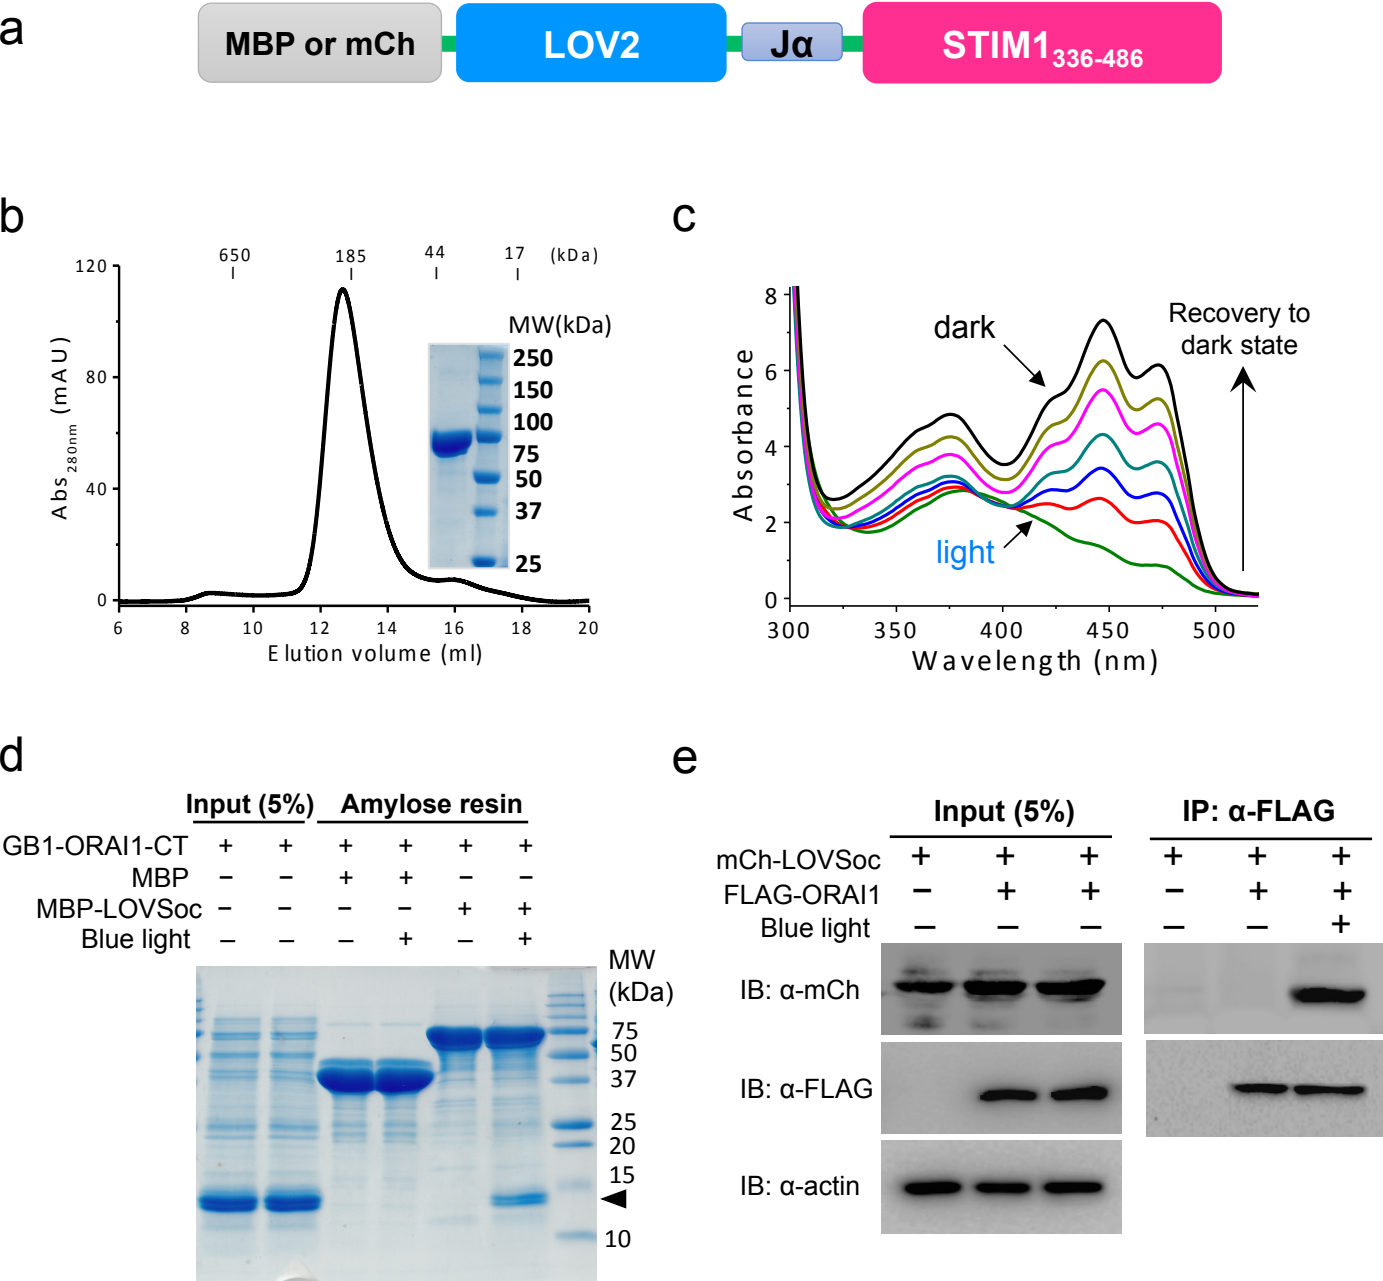

Supplement: supp [file elife_poa_e10024_Figure_1_figure_supplement_2.pdf › elife_poa_e10024_Figure_1_figure_supplement_2.pdf]

Figure 1 – figure supplement 3

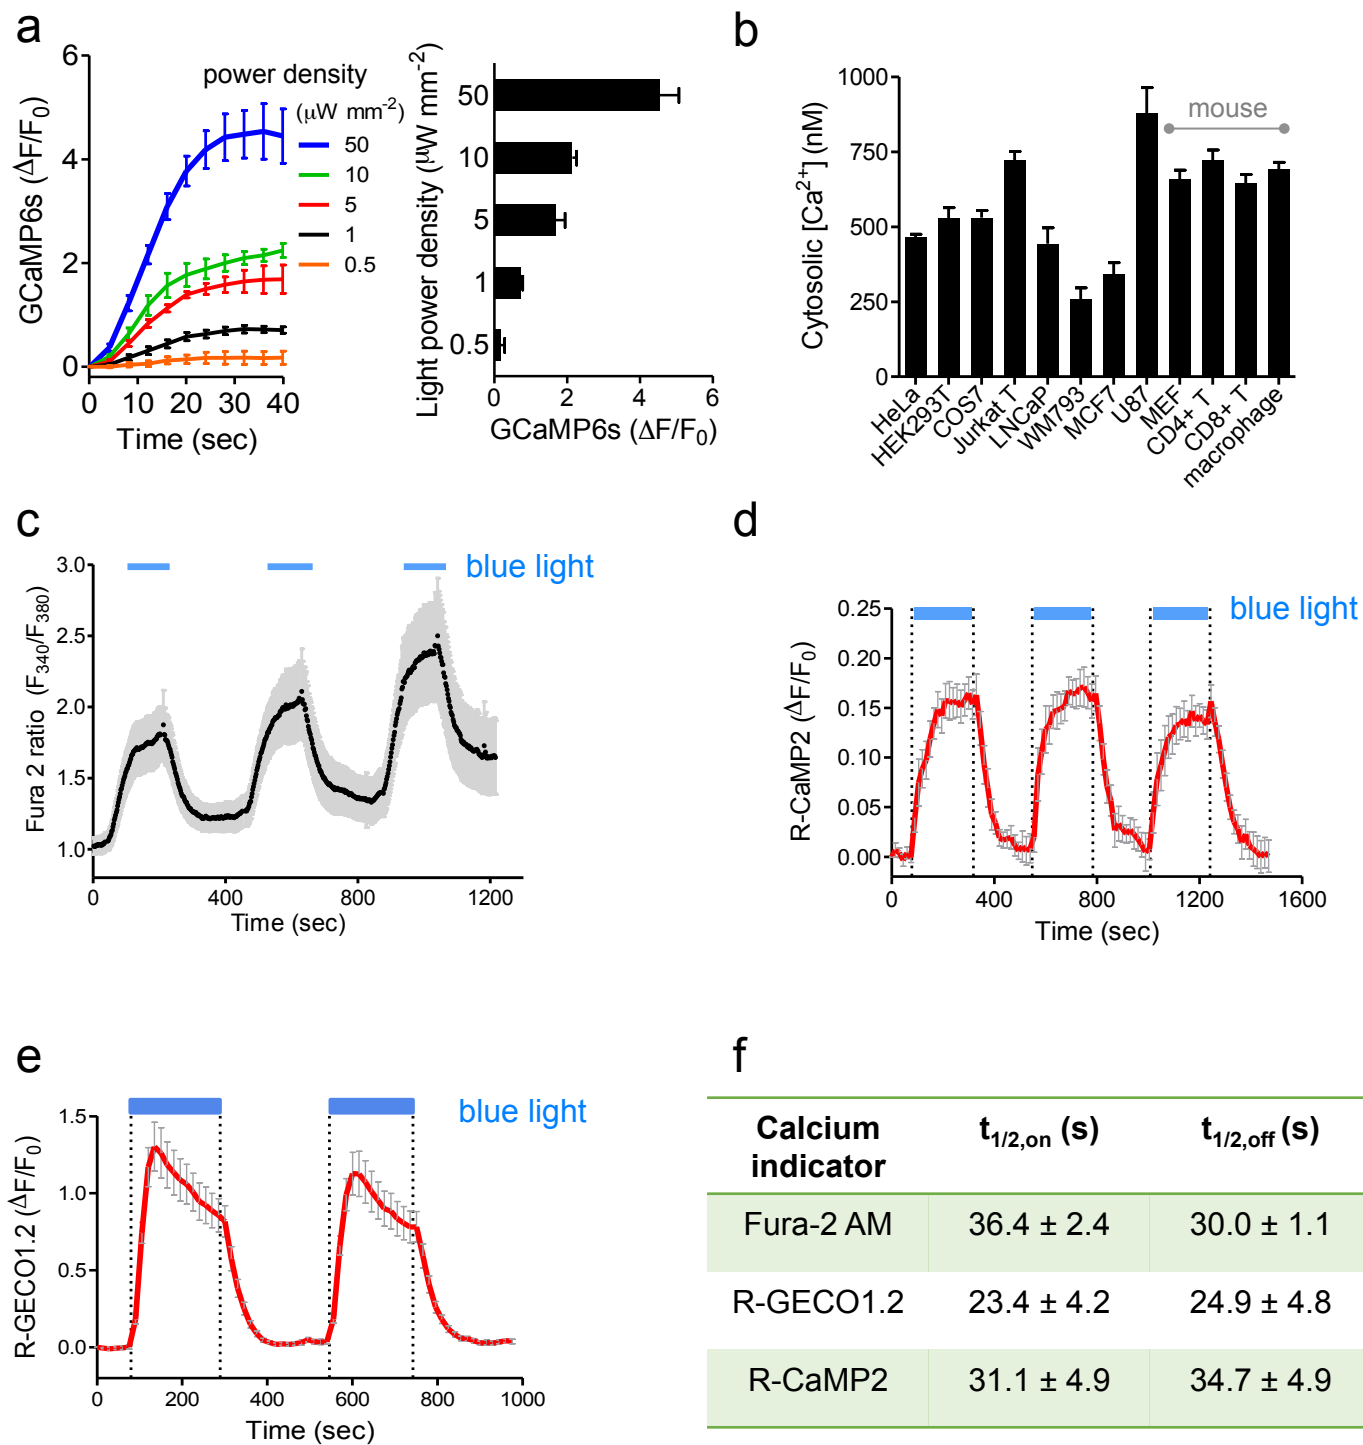

Supplement: supp [file elife_poa_e10024_Figure_1_figure_supplement_3.pdf › elife_poa_e10024_Figure_1_figure_supplement_3.pdf]

Figure 1 – figure supplement 4

a

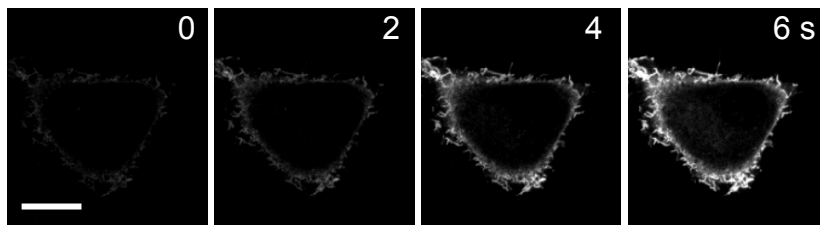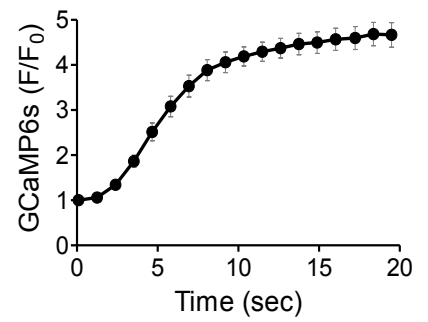

b

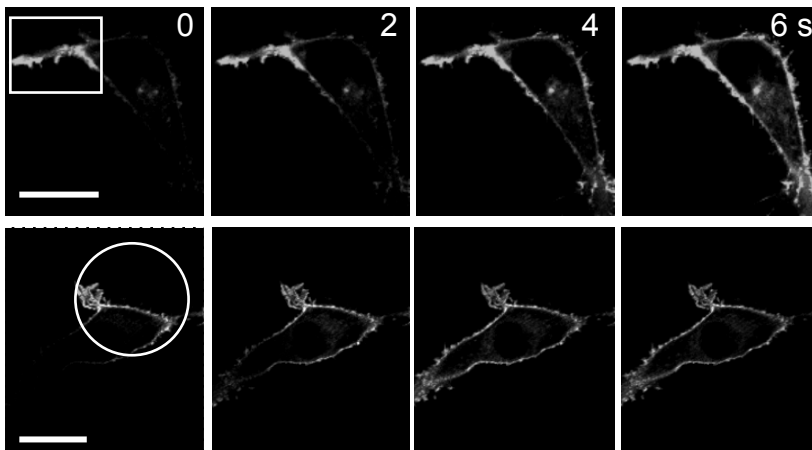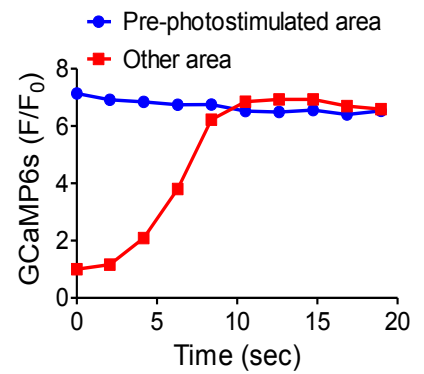

Supplement: supp [file elife_poa_e10024_Figure_1_figure_supplement_4.pdf › elife_poa_e10024_Figure_1_figure_supplement_4.pdf]

Figure 1 – figure supplement 6

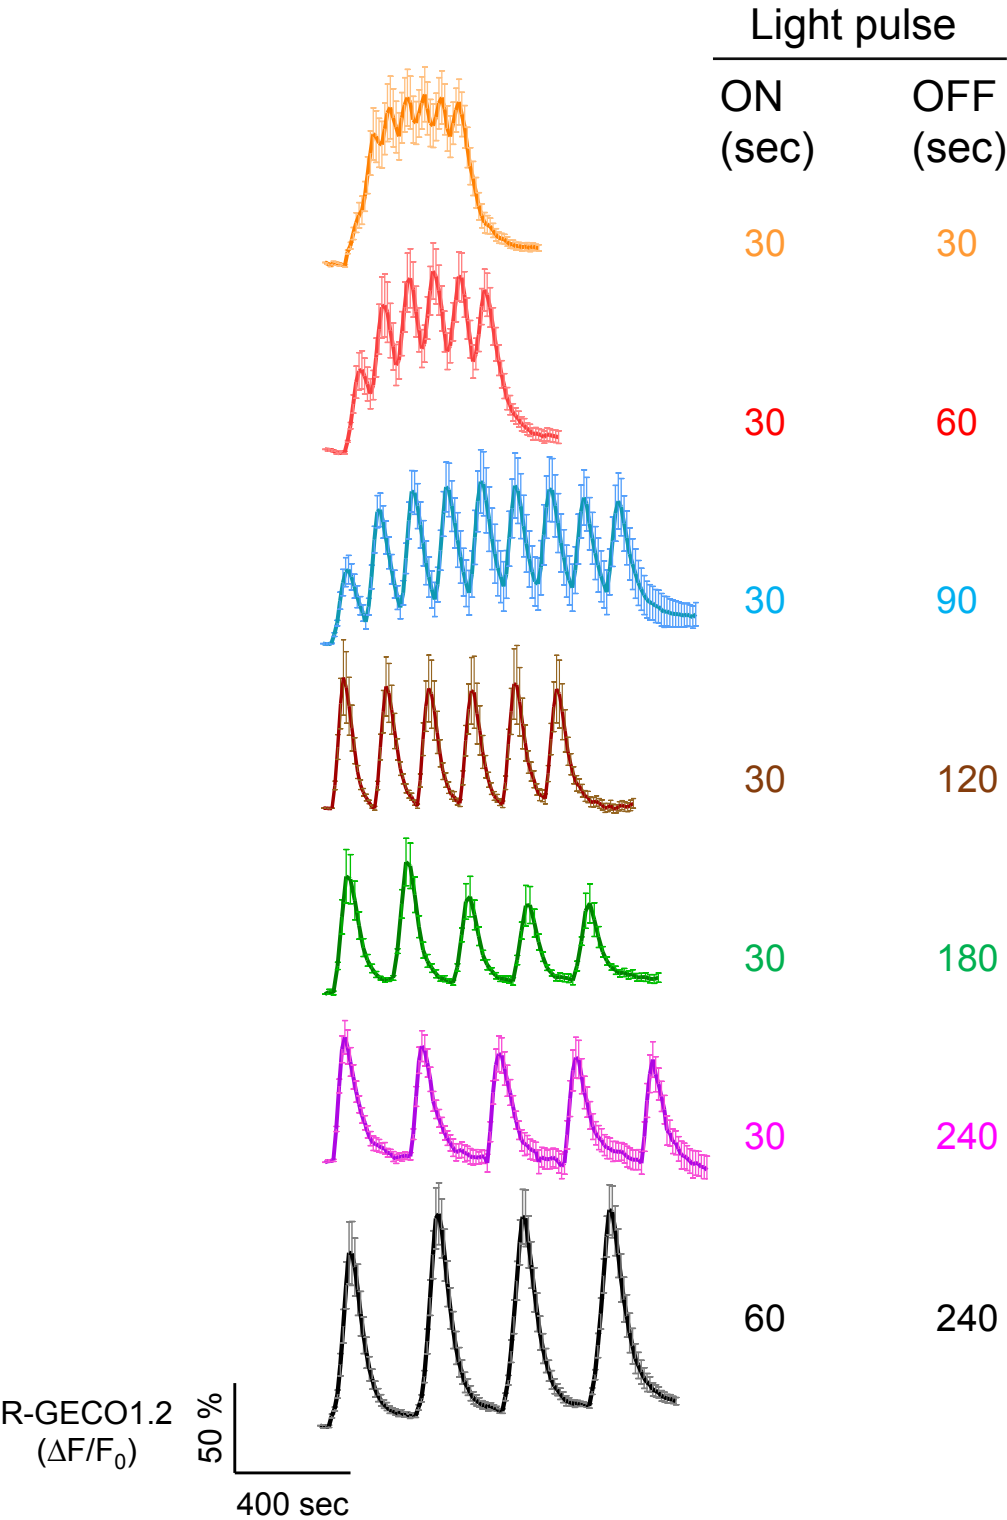

Supplement: supp [file elife_poa_e10024_Figure_1_figure_supplement_6.pdf › elife_poa_e10024_Figure_1_figure_supplement_6.pdf]

Figure 2 – figure supplement 1

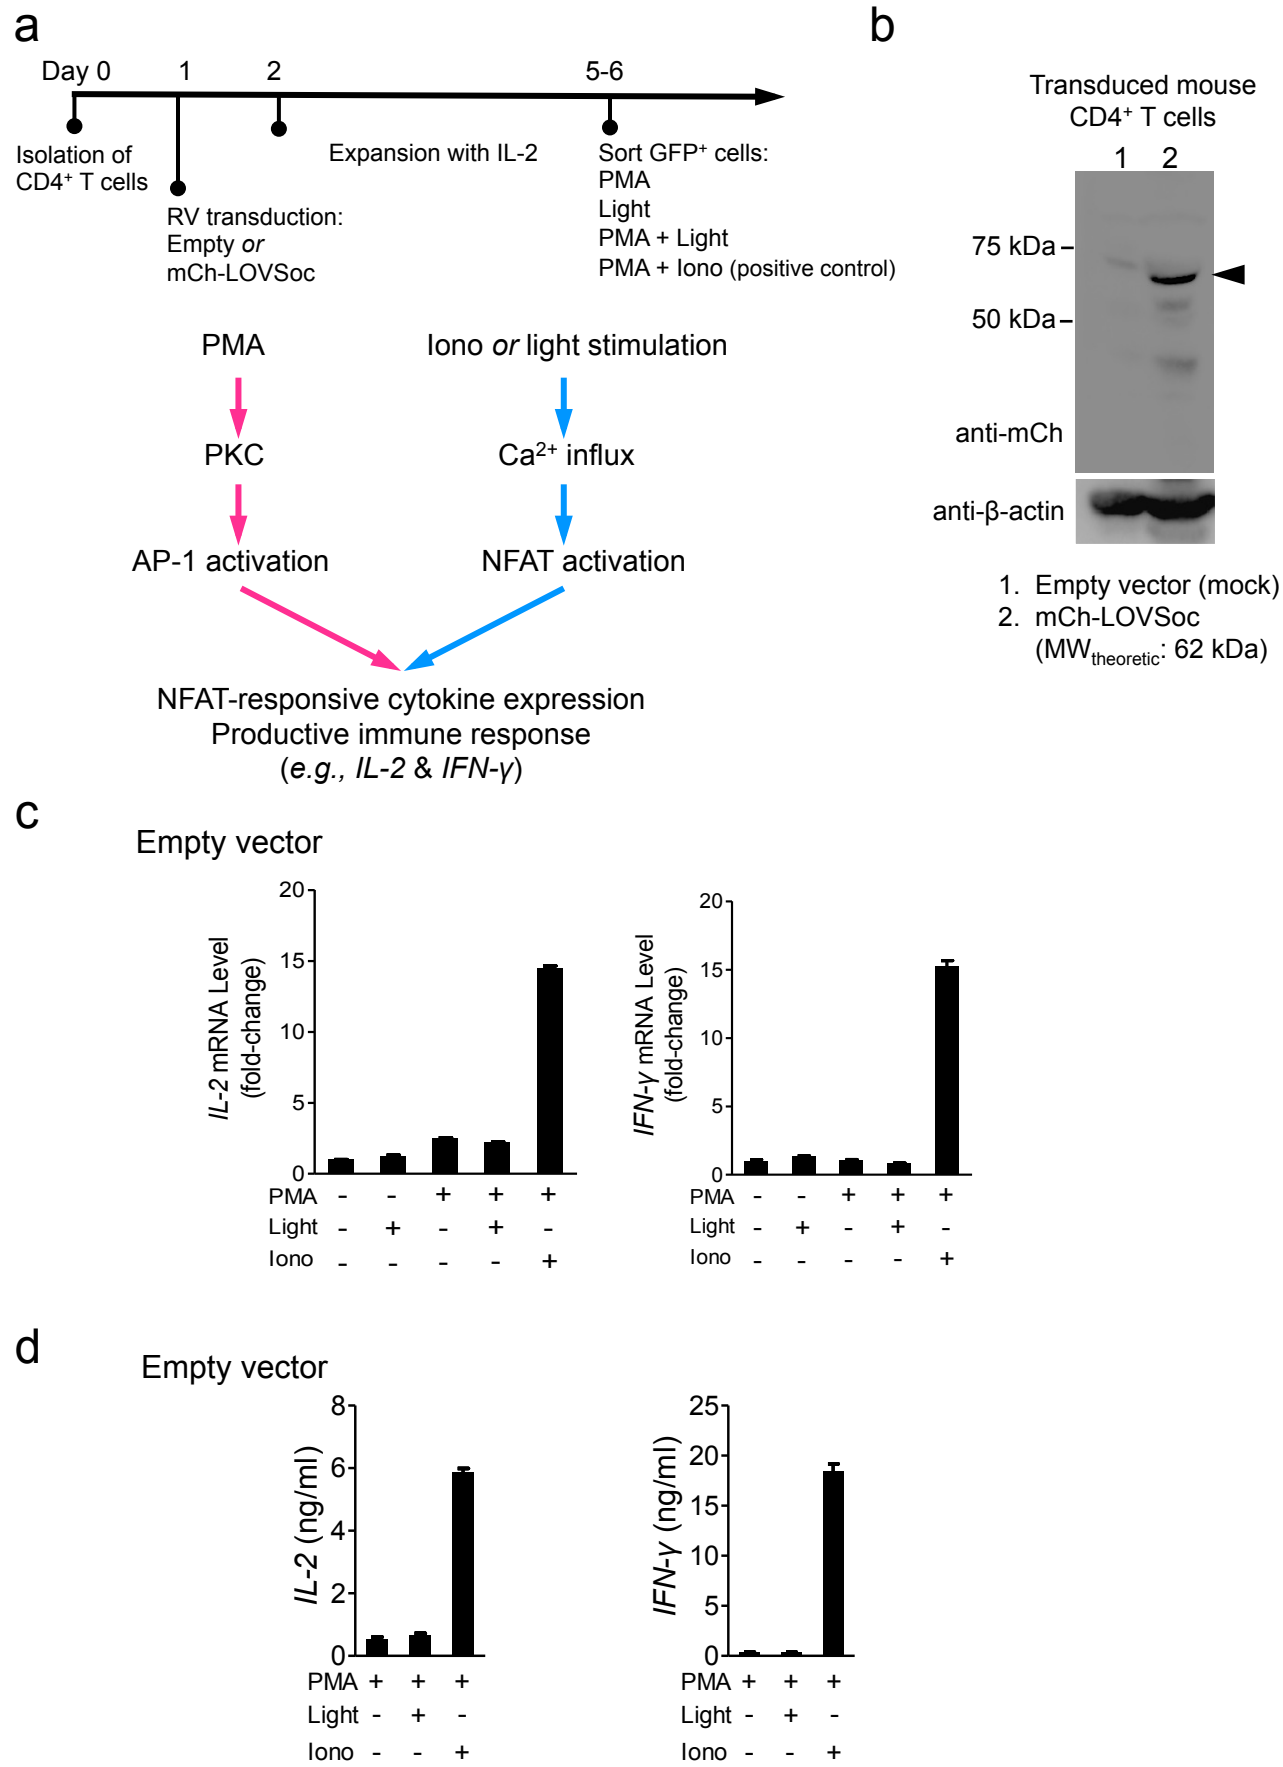

Supplement: supp [file elife_poa_e10024_Figure_2_figure_supplement_1.pdf › elife_poa_e10024_Figure_2_figure_supplement_1.pdf]

**Figure 3 – figure supplement 1**

**a**

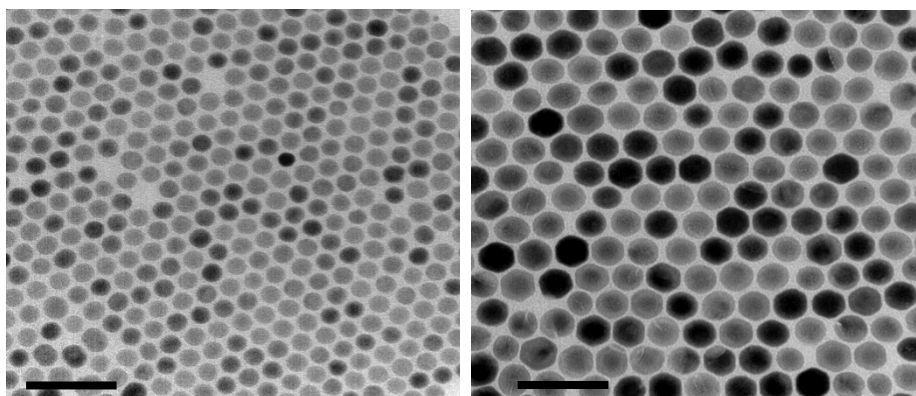

**b**

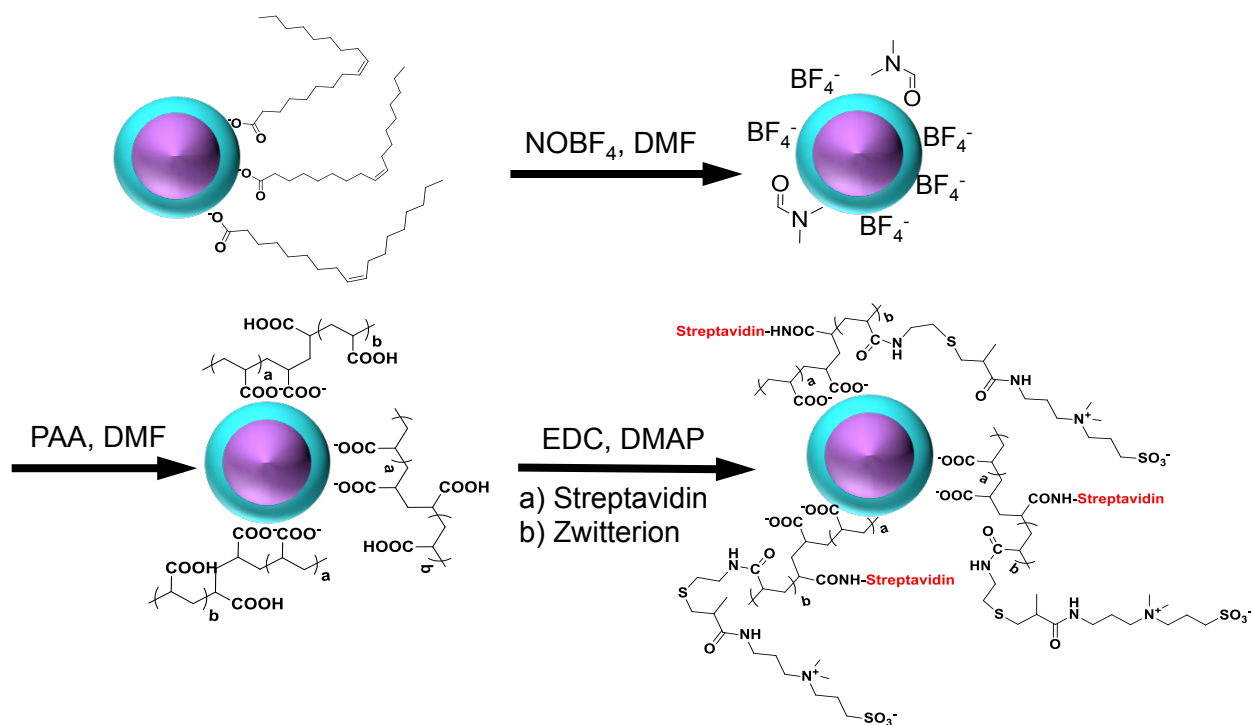

**c**

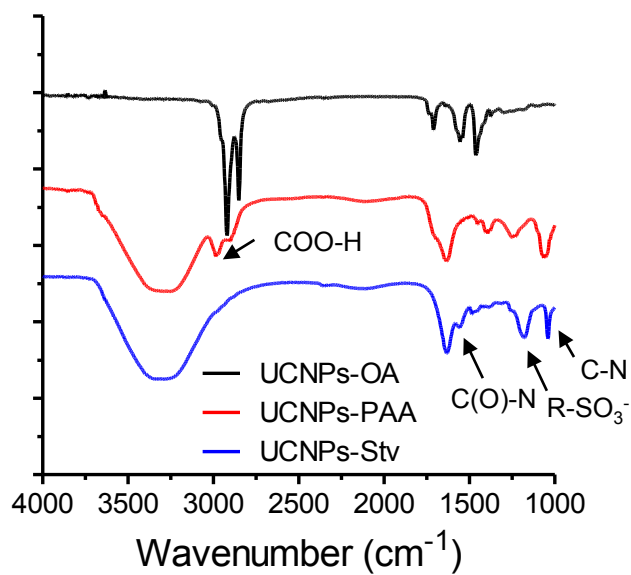

Supplement: supp [file elife_poa_e10024_Figure_3_figure_supplement_1.pdf › elife_poa_e10024_Figure_3_figure_supplement_1.pdf]

Figure 3 – figure supplement 2

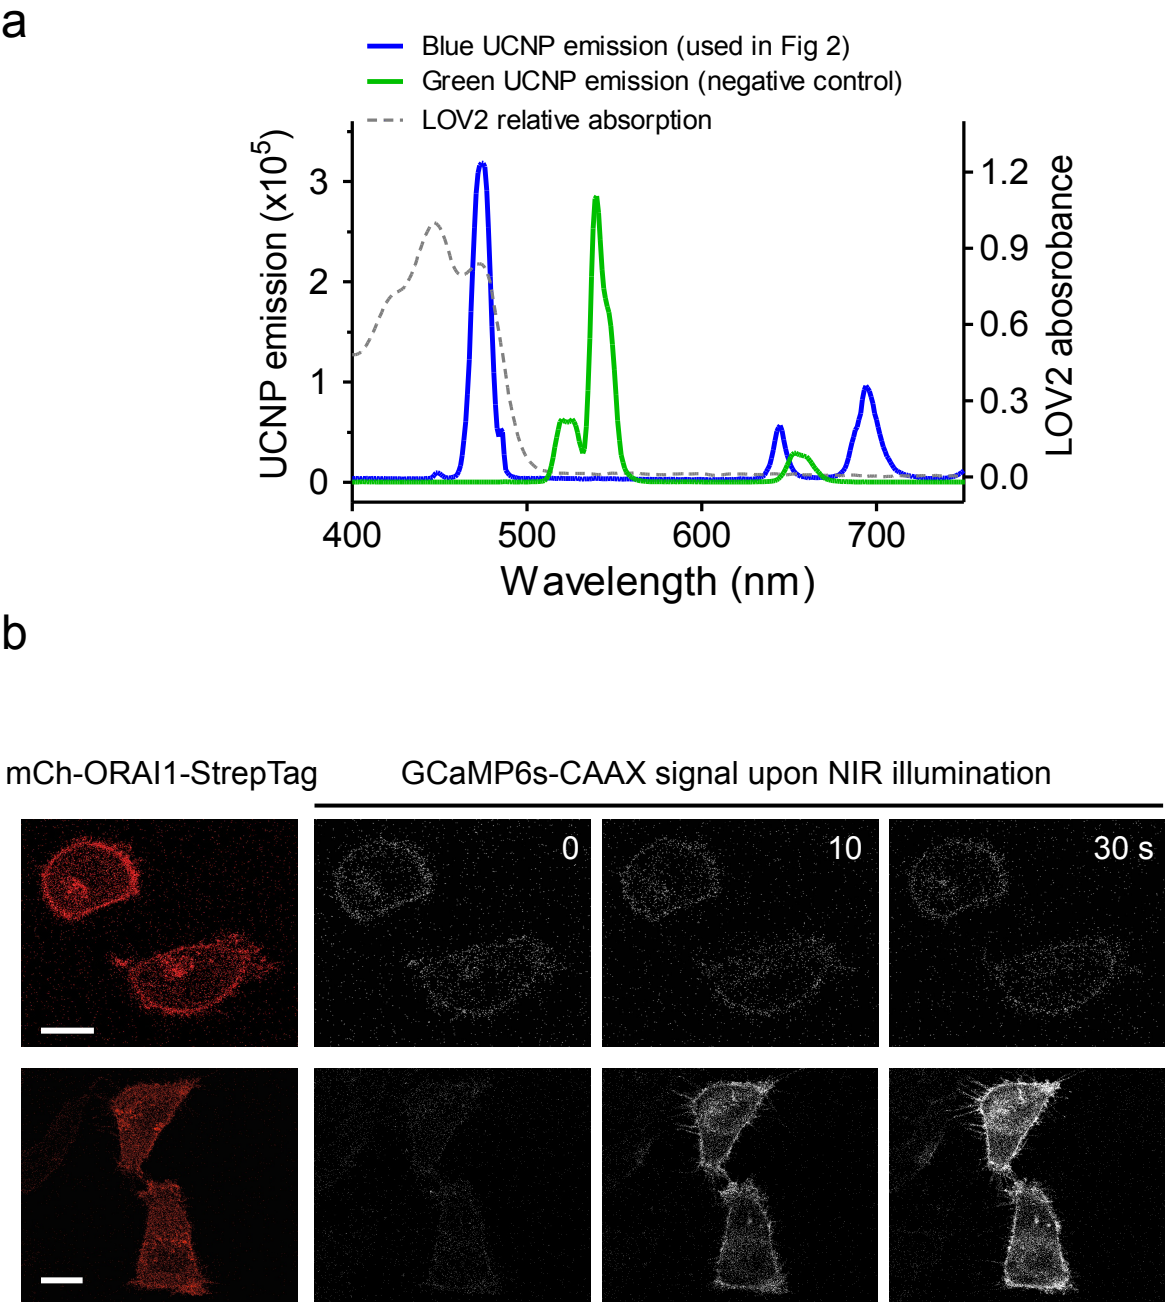

Supplement: supp [file elife_poa_e10024_Figure_3_figure_supplement_2.pdf › elife_poa_e10024_Figure_3_figure_supplement_2.pdf]

Figure 3 – figure supplement 3

a

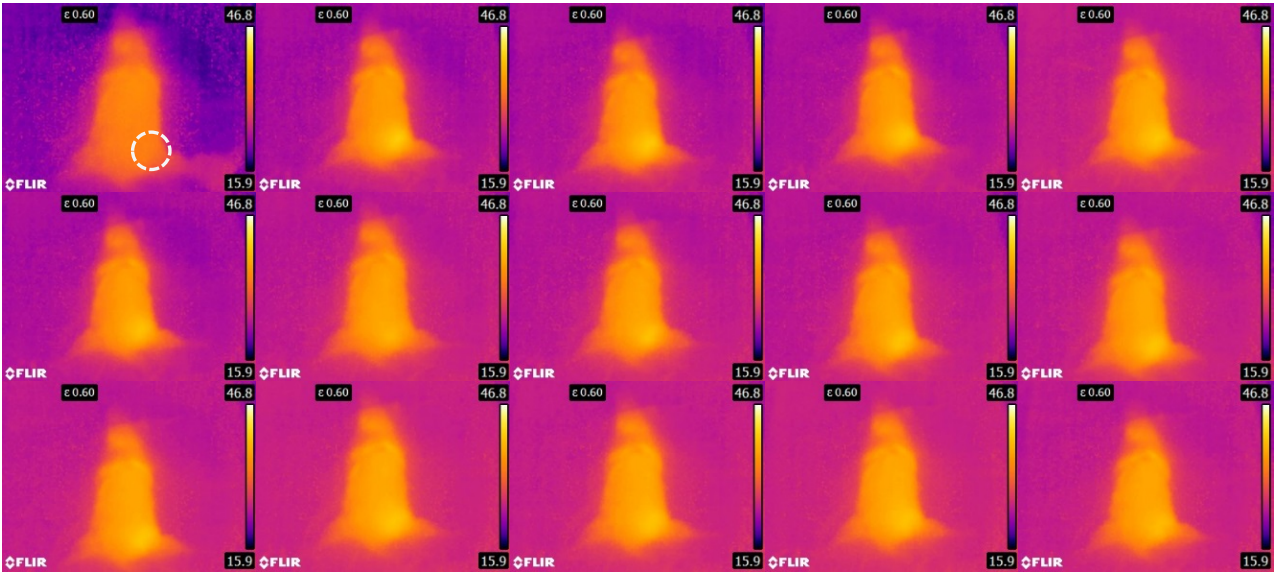

b

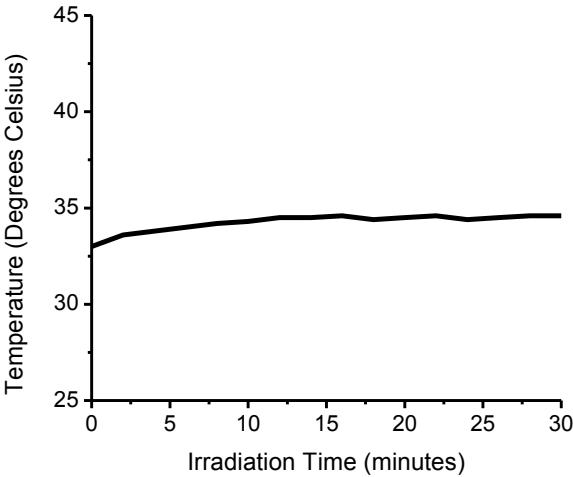

c

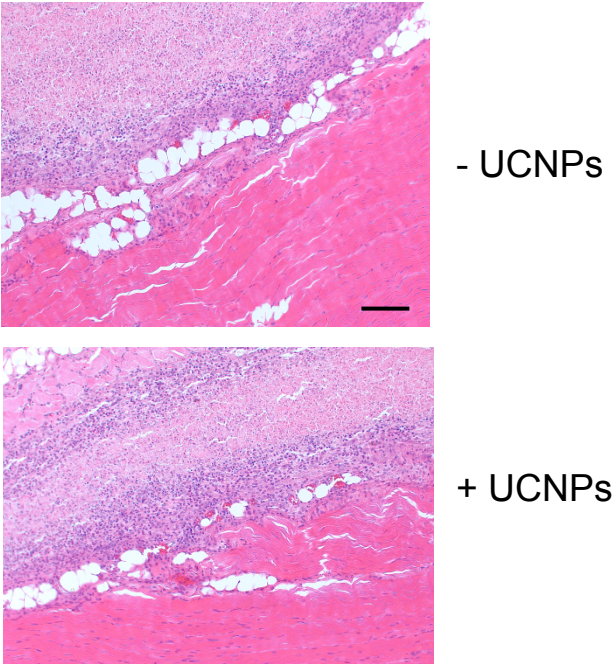

Supplement: supp [file elife_poa_e10024_Figure_3_figure_supplement_3.pdf › elife_poa_e10024_Figure_3_figure_supplement_3.pdf]
